# Supplementary material for: Toxicity of Carlina Oxide—A Natural Polyacetylene from the Carlina acaulis Roots—In Vitro and in Vivo Study
Source: PubMed Central journal article supplement (PMC7232248; doi:10.3390/toxins12040239), 2020-04-09
Supplement: toxins-12-00239-s001.pdf [file toxins-12-00239-s001.pdf]

# Supplementary Material: Toxicity of Carlina Oxide – a Natural Polyacetylene from the *Carlina acaulis* Roots – *in vitro* and *in vivo* study

Artur Wnorowski, Sylwia Wnorowska, Kamila Wojas-Krawczyk, Anna Grenda, Michał Staniak, Agnieszka Michalak, Sylwia Woźniak, Dariusz Matosiuk, Grażyna Biała, Magdalena Wójciak, Ireneusz Sowa, Paweł Krawczyk and Maciej Strzemski

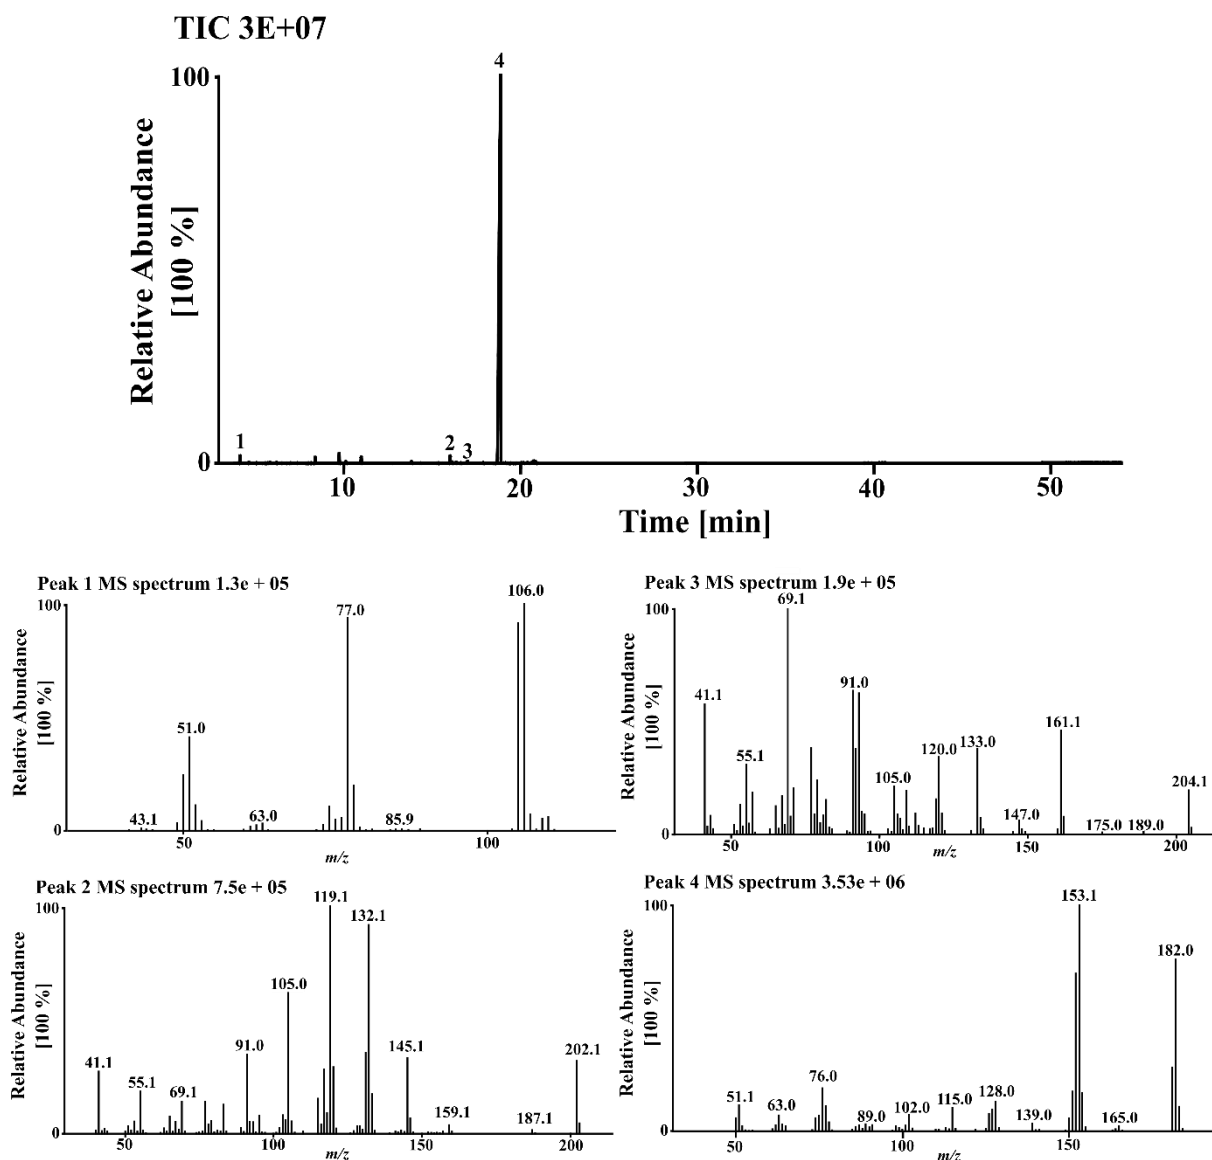

**Figure S1.** The total ion chromatogram and MS spectra obtained for the tested oil. 1: benzaldehyde, 2: *ar*-curcumene, 3:  $\beta$ -sesquiphellandrene, 4: carlina oxide.

**Table S1.** Chemical composition (% ± SD) of *Carlina acaulis* L. root essential oil.

| Peak no. | Compound             | RT (min) | RI   | RI*    | Mass data                                                                           | Content %    |
|----------|----------------------|----------|------|--------|-------------------------------------------------------------------------------------|--------------|
| 1        | benzaldehyde         | 4.11     | 960  | 952    | 106.0 (M+), 85.9, 77.0, 63.0, 51.0, 43.1                                            | 0.57 ± 0.002 |
| 2        | ar-curcumene         | 16.01    | 1485 | 1481   | 202.1 (M+), 187.1, 159.1, 145.1, 132.1, 119.1, 105.0, 91.0, 69.1, 55.1, 41.1        | 0.56 ± 0.031 |
| 3        | β-sesquiphellandrene | 16.98    | 1526 | 1523   | 204.1 (M+), 189.0, 175.0, 161.1, 147.0, 133.0, 120.0, 105.0, 91.0, 69.1, 55.1, 41.1 | 0.16 ± 0.012 |
| 4        | carlina oxide        | 18.87    | 1608 | 1613.1 | 182.0 (M+), 165.0, 153.1, 139.0, 128.0, 115.0, 102.0, 89.0, 76.0, 63.0, 51.1        | 96.2 ± 0.566 |
| Total    |                      |          |      |        |                                                                                     | 97.49        |

RT – retention times; RI - retention indices relative to C8-C20 alkanes on the DB-5MS column; RI\* - literature retention indices [1]; M+ - molecular ion.

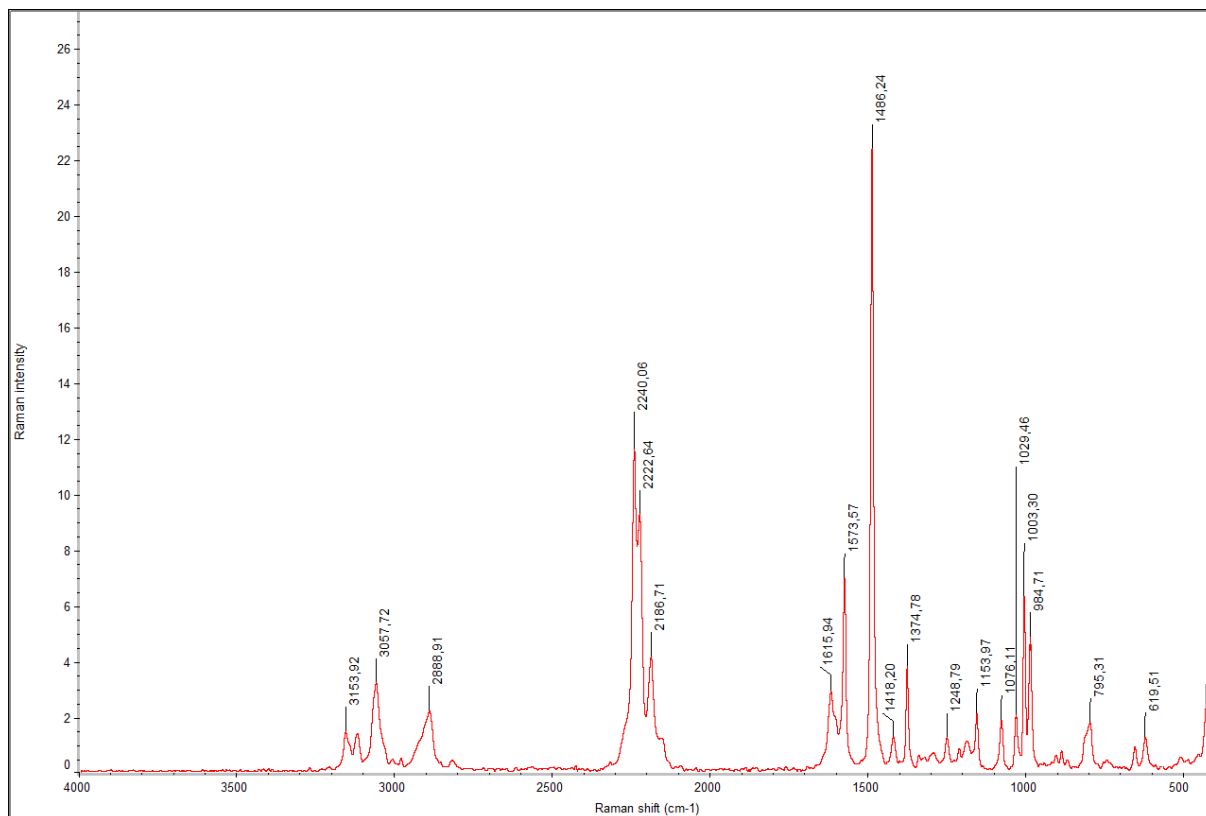

Figure S2. Raman spectrum of extracted essential oil.

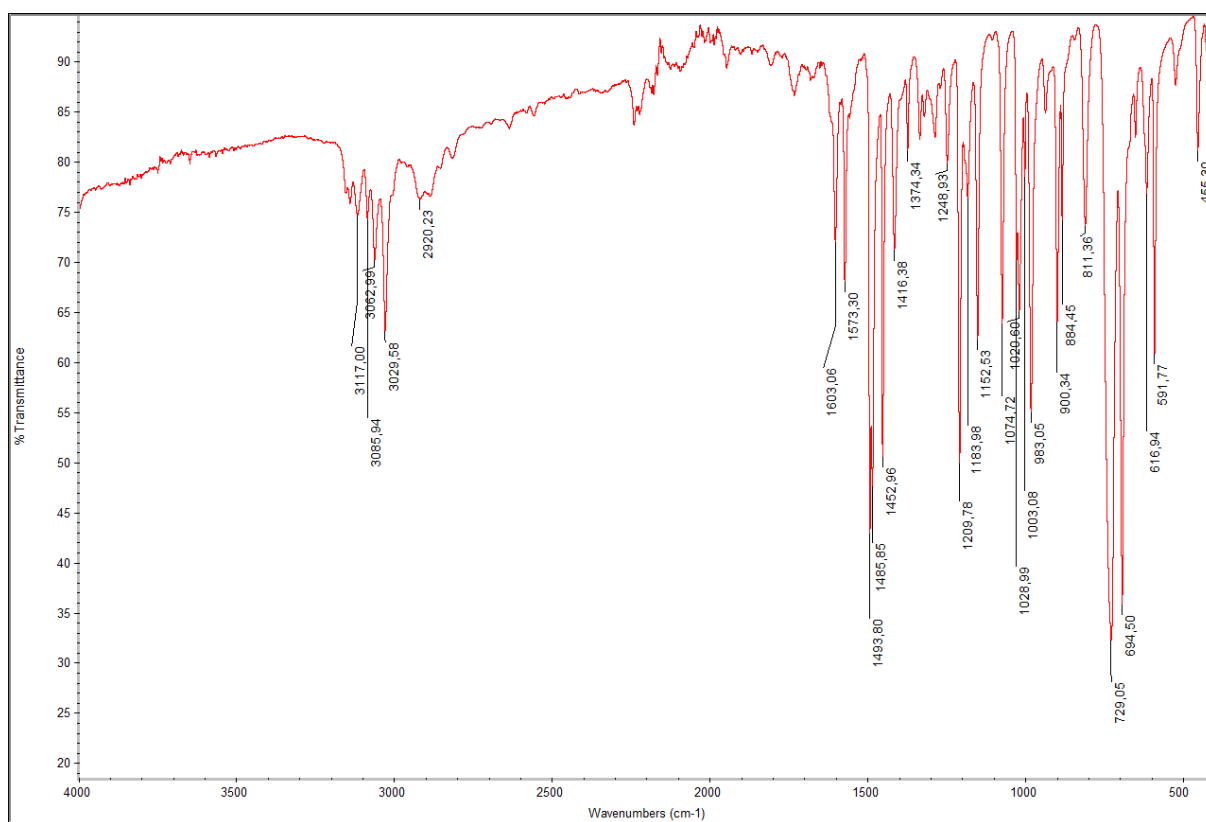

Figure S3. IR spectrum of extracted essential oil.

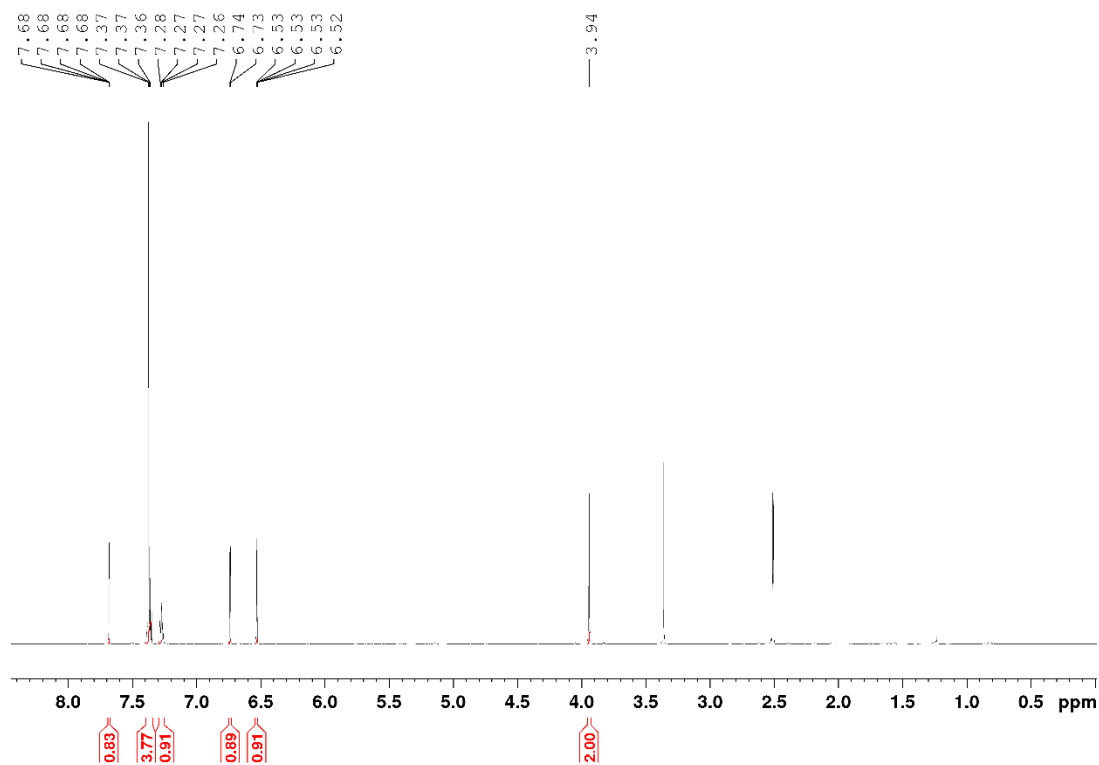

Figure S4.  $^1\text{H}$  NMR ( $\text{DMSO-}d_6$ ) spectrum of extracted essential oil.

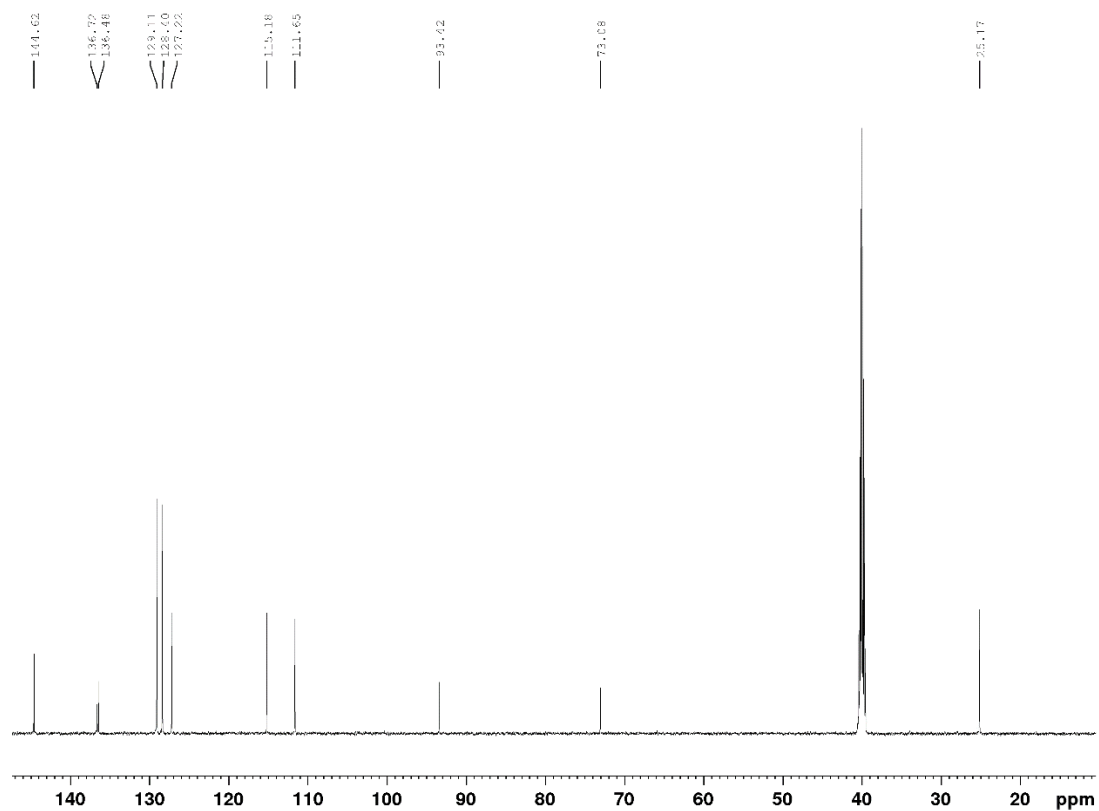

Figure S5.  $^{13}\text{C}$  NMR ( $\text{DMSO-}d_6$ ) spectrum of extracted essential oil.

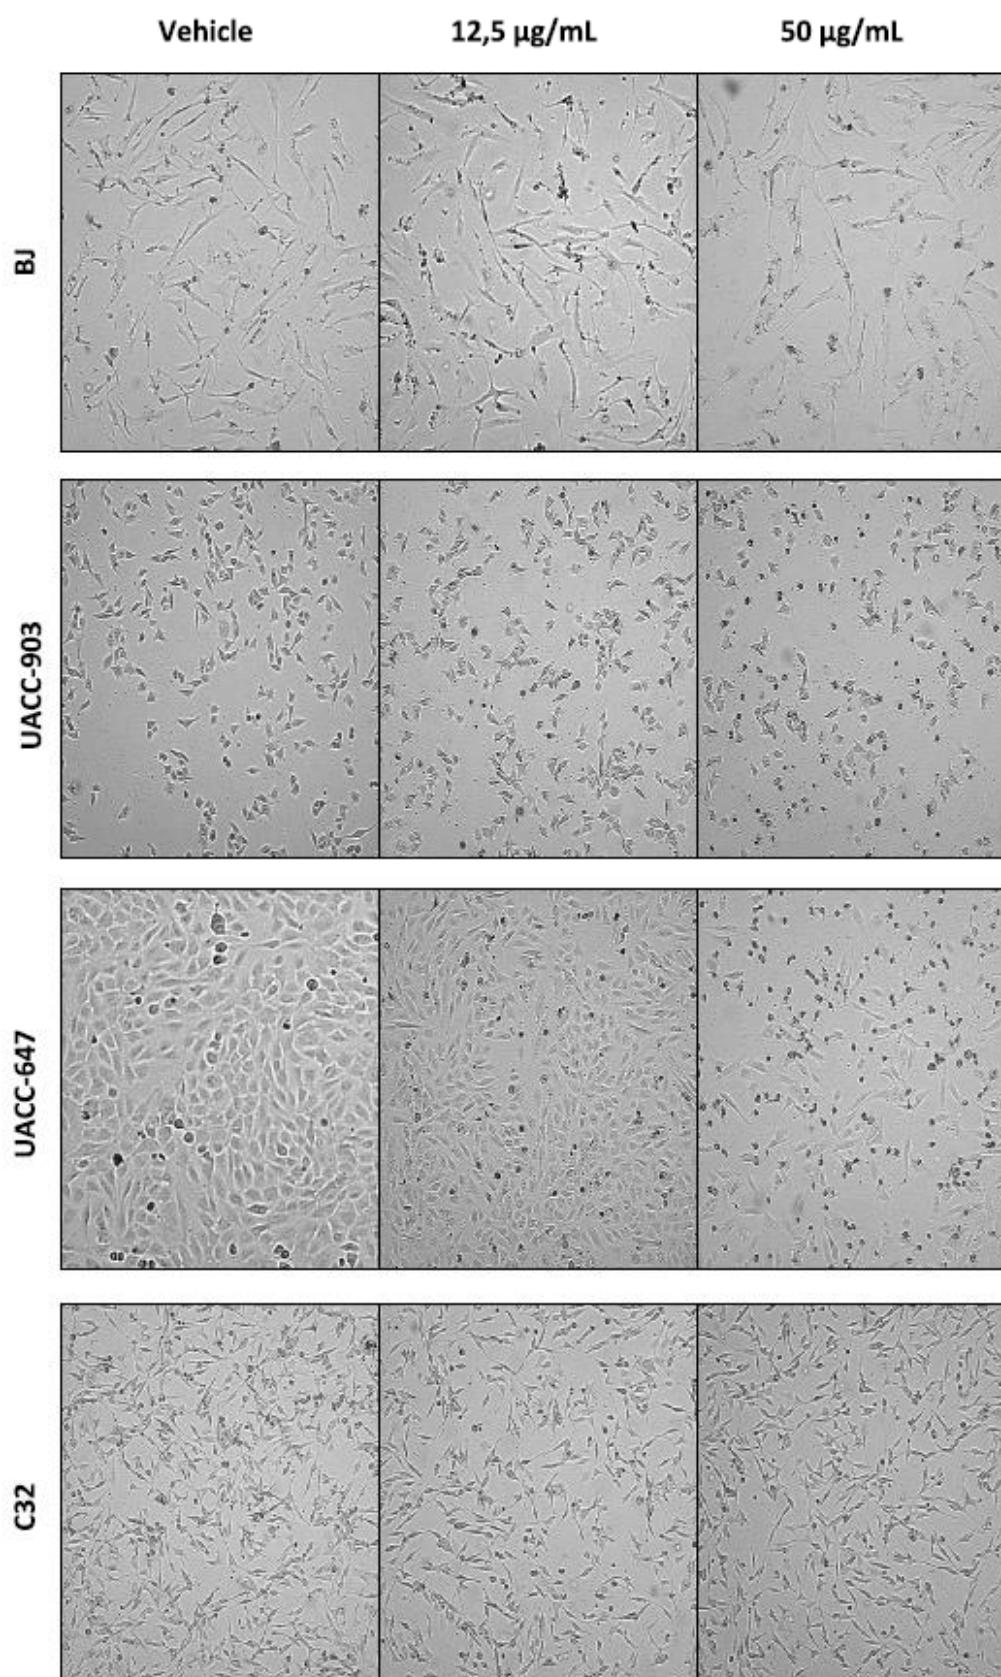

**Figure S6.** Representative microscopic images the BJ, UACC-903, UACC-647 and C32 cells exposed to either vehicle or carlina oxide (12,5 or 50  $\mu\text{g/mL}$ ) for 24 h.

## References

1. Strzemiński, M.; Wójciak-Kosior, M.; Sowa, I.; Agacka-Mołdoch, M.; Drączkowski, P.; Matusiuk, D.; Kurach, Ł.; Kocjan, R.; Dresler, S. Application of Raman spectroscopy for direct analysis of *Carlina acanthifolia* subsp. *utzka* root essential oil. *Talanta* **2017**, *174*, 633–637.
